# Supplementary material for: Exogenous Paclobutrazol Reinforces the Antioxidant and Antimicrobial Properties of Lavender (Lavandula officinalis L.) Oil through Modulating Its Composition of Oxygenated Terpenes
Source: MDPI journal article supplement (doi:10.3390/plants11121607), 2022-06-19
Supplement: s1 [file s1]

**Table S1.** Quantity of Constituents of the Lavender Essential Oil (%) Identified by GC-MS Analysis of Untreated and Treated with Paclobutrazole Lavender Plants

| No. | Compound                    | Control | T1<br>(200ppm<br>paclobutrazole) | T2<br>(400ppm<br>paclobutrazole) | T3<br>(600ppm<br>paclobutrazole) |
|-----|-----------------------------|---------|----------------------------------|----------------------------------|----------------------------------|
| 2   | $\alpha$ -Pinene            | 1.07    | -                                | -                                | -                                |
| 3   | $\beta$ -Pinene             | 0.95    | -                                | 0.69                             | -                                |
| 4   | Carveol                     | 0.98    | -                                | -                                | 0.37                             |
| 5   | $\alpha$ -Phellandrene      | 2.01    | -                                | 0.66                             | -                                |
| 6   | Eucalyptol                  | 21.55   | 29.89                            | 22.95                            | 0.64                             |
| 7   | $\gamma$ -Terpinene         | 0.89    | -                                | 0.92                             | -                                |
| 8   | Terpinolene                 | 0.91    | -                                | -                                | -                                |
| 9   | L-camphor                   | 17.56   | 13.76                            | 16.67                            | 9.98                             |
| 10  | $\alpha$ -Pinocarvone       | 1.52    | -                                | 1.65                             | -                                |
| 11  | $\alpha$ -Terpineol         | 6.07    | -                                | 5.35                             | -                                |
| 12  | Limonene dioxide            | 2.22    | -                                | -                                | -                                |
| 13  | $\alpha$ -Terpinyl acetate  | 3.17    | -                                | 0.63                             | -                                |
| 14  | Myrtenol                    | 2.55    | -                                | -                                | -                                |
| 16  | trans-Carveol               | 0.94    | -                                | -                                | 0.43                             |
| 17  | Isocaryophyllene            | 2.22    | -                                | -                                | -                                |
| 18  | Acorenone B                 | 0.42    | -                                | -                                | -                                |
| 19  | L- $\alpha$ -bornyl acetate | 0.28    | -                                | -                                | -                                |
| 20  | p-Cymen-7-ol                | 0.79    | -                                | 0.71                             | -                                |
| 21  | Hexyl tiglate               | 1.02    | -                                | -                                | -                                |
| 22  | Lanceol, cis                | 0.39    | -                                | 0.25                             | -                                |
| 23  | Nootkatone                  | 0.37    | -                                | 0.52                             | -                                |
| 24  | Caryophyllene oxide         | 0.23    | -                                | 0.25                             | 9.94                             |
| 25  | $\beta$ -Copaene            | 0.22    | -                                | -                                | -                                |
| 26  | Viridiflorene               | 0.34    | -                                | -                                | -                                |
| 27  | Thujopsen                   | 0.49    | -                                | -                                | -                                |
| 28  | Caryophyllene               | 0.47    | -                                | 0.61                             | -                                |
| 29  | $\beta$ -Vetivenene         | 0.5     | -                                | 0.87                             | -                                |
| 30  | $\alpha$ -Copaen-11-ol      | 0.67    | -                                | -                                | -                                |
| 31  | Cadinene                    | 0.46    | -                                | -                                | -                                |
| 32  | $\beta$ -Eudesmene          | 0.4     | -                                | -                                | -                                |
| 33  | $\beta$ -Spathulenol        | 0.69    | -                                | 0.43                             | -                                |
| 34  | $\delta$ -Elemene           | 0.55    | -                                | 0.42                             | -                                |
| 35  | Valencene                   | 2.87    | -                                | -                                | -                                |
| 36  | trans-Calamenene            | 0.53    | -                                | -                                | -                                |
| 37  | $\alpha$ -Calacorene        | 0.78    | -                                | 0.31                             | -                                |
| 38  | Humulene oxide II           | 0.64    | -                                | -                                | -                                |
| 39  | Costol                      | 0.41    | -                                | -                                | -                                |
| 40  | $\beta$ -Santalol           | 1.31    | -                                | 1.99                             | -                                |
| 41  | Ledol                       | 0.52    | -                                | 0.74                             | -                                |
| 42  | Epicubebol                  | 0.92    | -                                | -                                | -                                |
| 43  | $\delta$ -Cadinol           | 0.57    | -                                | -                                | -                                |
| 44  | $\alpha$ -epi-Muurolol      | 2.21    | -                                | -                                | -                                |

|    |                                                                     |      |       |      |       |
|----|---------------------------------------------------------------------|------|-------|------|-------|
| 45 | Elemol                                                              | 0.78 | -     | -    | -     |
| 46 | Corymbolone                                                         | 0.24 | -     | -    | -     |
| 47 | Clovane                                                             | 2.09 | -     | -    | -     |
| 48 | Dehydroxy-<br>isocalamendiol                                        | 0.46 | -     | -    | -     |
| 49 | Cedrenol                                                            | 0.74 | -     | -    | -     |
| 50 | Longiverbenone                                                      | 0.68 | -     | -    | -     |
| 51 | $\alpha$ -Santonin                                                  | 0.45 | -     | -    | 1.34  |
| 52 | $\gamma$ -Elemene                                                   | 0.51 | -     | -    | -     |
| 53 | Phytol                                                              | 0.78 | -     | 0.61 | 2.26  |
| 54 | 1-Octadecyne                                                        | 0.44 | -     | -    | -     |
| 55 | Citronellyl valerate                                                | 0.56 | -     | -    | -     |
| 56 | Geranyl isovalerate                                                 | 0.31 | 14.01 | 0.32 | 2.34  |
| 57 | Kaempferitrin                                                       | 0.56 | -     | -    | -     |
| 58 | Phytanic acid                                                       | 0.31 | 0.63  | -    | 2.14  |
| 59 | Farnesol                                                            | 0.26 | -     | 0.36 | -     |
| 60 | 1-Hexacosanol                                                       | 0.26 | -     | -    | -     |
| 61 | 2-Hexadecanol                                                       | 0.4  | -     | -    | 0.27  |
| 62 | Dihydrocarvone                                                      | -    | 0.37  | 3.6  | 1.29  |
| 63 | Vitexin                                                             | -    | 1.93  | -    | 2.15  |
| 64 | 3-(3,4-Dimethoxyphenyl)-<br>4-methylcoumarin                        | -    | 4.92  | -    | 5.32  |
| 65 | 2,4-Dimethoxy-2'-<br>hydroxy-5'-<br>methylchalcone                  | -    | 10.23 | -    | 4.48  |
| 66 | Gardenin                                                            | -    | 5.45  | -    | -     |
| 67 | $\alpha$ -Fenchene                                                  | -    | -     | -    | 0.31  |
| 68 | (+)-cis-Verbenol, acetate                                           | -    | -     | -    | 0.33  |
| 69 | $\beta$ -Acorenol                                                   | -    | -     | -    | .0.98 |
| 70 | 5 $\beta$ ,7 $\beta$ H,10 $\beta$ -Eudesm-11-<br>en-1 $\alpha$ -ol  | -    | -     | 0.68 | 0.99  |
| 71 | 4-Hydroxy-b-ionone                                                  | -    | -     | -    | 3.47  |
| 72 | 5,8,11,14,17-<br>Eicosapentaenoic acid,<br>methyl ester, (all-Z)-   | -    | -     | -    | 5.36  |
| 73 | epi-g-Eudesmol                                                      | -    | -     | -    | 2.75  |
| 74 | 4-(3-Hydroxy-2,6,6-<br>trimethylcyclohex-1-<br>enyl)pent-3-en-2-one | -    | -     | -    | 4.18  |
| 75 | n-Hexadecanoic acid                                                 | -    | -     | 1.07 | 15.62 |
| 76 | Hexa-hydro-farnesol                                                 | -    | -     | -    | 2.55  |
| 77 | Farnesyl methyl ester                                               | -    | -     | -    | 2.74  |
| 78 | Isocalamenedio                                                      | -    | -     | 0.34 | 2.67  |
| 79 | 6,7,3',4'-<br>Tetramethoxyflavone                                   | -    | -     | -    | 1.55  |
| 80 | 3',4',5',5,6,7-<br>Hexamethoxyflavone                               | -    | -     | -    | 3.57  |
| 81 | 4',5,7-Trihydroxy3,6,8-                                             | -    | -     | -    | 1.05  |

|     |                                                                  |    |   |      |      |
|-----|------------------------------------------------------------------|----|---|------|------|
|     | trimethoxyflavone                                                |    |   |      |      |
| 82  | 4,7-Dimethyl-3-(4-methoxyphenyl)coumarin                         | -  | - | -    | 1.94 |
| 83  | Pseudolimonen                                                    | -  | - | 1.73 | -    |
| 84  | 1,3,8-p-Menthatriene                                             | -  | - | 1.07 | -    |
| 85  | cis-Verbenol                                                     | -  | - | 0.24 | -    |
| 86  | Linalool                                                         | -  | - | 2.25 | -    |
| 87  | 2-Pinen-10-ol                                                    | -  | - | 1.25 | -    |
| 88  | $\alpha$ -Farnesene                                              | -  | - | 3.8  | -    |
| 89  | L-Pinocarveol                                                    | -  | - | 1    | -    |
| 90  | D-Carvone                                                        | -  | - | 1.93 | -    |
| 91  | Isoborneol, acetate                                              | -  | - | 0.28 | -    |
| 92  | Piperitone                                                       | -  | - | 1.03 | -    |
| 93  | $\alpha$ -Gurjunene                                              | -  | - | 0.33 | -    |
| 94  | $\alpha$ -Cedrene                                                | -  | - | 0.44 | -    |
| 95  | Leden                                                            | -  | - | 3.58 | -    |
| 96  | Levorphanol                                                      | -  | - | 0.47 | -    |
| 97  | 2,6,10-Dodecatrien-1-ol, 3,7,11-trimethyl                        | -  | - | 1.01 | -    |
| 98  | $\alpha$ -Santalol                                               | -  | - | 0.42 | -    |
| 99  | Cubebol                                                          | -  | - | 1.2  | -    |
| 100 | 3,4,5-Trimethoxycinnamic acid                                    | -  | - | 0.23 | -    |
| 101 | d-Cedrol                                                         | -  | - | 3.2  | -    |
| 102 | b-Eudesmol                                                       | -  | - | 1.28 | -    |
| 103 | g-Himachalene                                                    | -  | - | 0.66 | -    |
| 104 | 2H-Cycloprop[c]indene-2,3(3ah)-dione, hexahydro-3a,7,7-trimethyl | -  | - | 1.8  | -    |
| 105 | Torulosol                                                        | -  | - | 0.85 | -    |
| 106 | 6,9,12-Octadecatrienoic acid                                     | -  | - | 0.25 | -    |
| 107 | 9,12-Octadecadienoic acid (Z,Z)-                                 | -  | - | 0.79 | -    |
| 108 | Isophytol                                                        | -  | - | 0.27 | -    |
| 109 | Heptacosane                                                      | -  | - | 0.23 | -    |
|     | Number of detected compound                                      | 61 | 9 | 54   | 31   |
